# Supplementary material
Source: HighWire-hosted journal article supplement (https://bmjopen.bmj.com/content/12/6/e059254)
Supplement: inline-supplementary-material-1 [file inline-supplementary-material-1.pdf]

## Supplementary file 1: Proposed variables list for the study

Facility name: \_\_\_\_\_

Date of visit: DD/MM/YY

**Baseline: Sociodemographic**

1. Assigned unique id
2. Age
3. Sex
4. Weight
5. Height
6. Educational status
7. Marital status
8. Occupation
9. Region
10. Smoking
11. Alcohol
12. Family history of DM

**Baseline: Clinical**

13. HIV status
14. Year HIV Diagnosis
15. Past TB Treatment
16. Date TB diagnosis
17. Type of TB (Drug Sensitive, Rifampicin Resistant, Drug-Resistant, Extra-Drug Resistant)
18. TB Drugs Regimen
19. HIV Drugs Regimen
20. Last Viral Load result
21. DM on admission
22. DM Treatment

**Baseline and follow-up variables**

23. Visit Date (DD/MM/YY)
24. Fasting Blood Sugar (FBS) (mmol/l)
25. Systolic Blood Pressure (SBP) (mmHg)
26. Diastolic Blood Pressure (DBP) (mmHg)
27. Sputum Acid-Fast Bacilli (AFB)
28. Sputum Culture
29. Adverse Event
30. Adverse Event Type
31. DM Diagnosis
32. Treatment Outcome
