# Supplementary material
Source: HighWire-hosted journal article supplement (https://bmjopen.bmj.com/content/12/6/e059254)
Supplement: inline-supplementary-material-2 [file inline-supplementary-material-2.pdf]

## Supplementary file 2: Healthcare Workers Interview Questionnaire

Date: \_\_\_\_\_

**Health facility description (To be filled in by the researcher)**

1. Questionnaire Identification Number: \_\_\_\_\_
2. Facility type: Hospital/Health centre/ Clinic
3. Facility location: Urban/Semi-urban/Rural

**Section A: INTRODUCTIONS**

- The researcher introduces herself and confirms the healthcare worker is the right one who is scheduled for the interview.
- The researcher gives an overview of the study to the healthcare worker and hands her a copy of the study information sheet (the healthcare worker would have received one by email some days before the interview).
- If the healthcare worker accepts to participate in the study, s/he is given the consent form to review and endorse.

**Section B: SURVEY****Sociodemographic Details**

1. Date of Birth: \_\_\_\_\_
2. Gender: Male/Female/Other
3. Region of residence: Hhohho/Lubombo/Manzini/Shiselweni

**Occupational History**

1. Region hospital is located: Hhohho/Lubombo/Manzini/Shiselweni
2. Occupation/profession type e.g., a. Nurse b. Doctor
3. Nature of work a. direct patient care c. Other
4. Highest qualification a. Certificate b. Diploma c. Degree d. Post-graduate
5. Total number of years in your profession \_\_\_\_\_
6. Duration of years providing care for TB patients \_\_\_\_\_
7. Received training for Non-communicable diseases Yes/No
8. Received specific training in TB/NCD care. Yes/No
9. Received specific training in TB/Diabetes care. Yes/No
10. Number of in-service training received in the last twelve-months \_\_\_\_\_

**Patient Care related Questions**

1. In a month how many TB patients on the average present with a non-communicable disease (NCD) in your hospital e.g. of NCD – hypertension, diabetes, asthma, cancers \_\_\_\_\_
2. What is the commonest NCD they present with? \_\_\_\_\_
3. In a month how many TB patients present with Diabetes Mellitus (This is baseline blood glucose >7.0 mmol/dl)? \_\_\_\_\_
4. Indicate Yes/No if the following are readily available at your health facility:
  - a. Policy document on TB care
  - b. Current National TB Treatment guidelines
  - c. Standard Operating Procedure (SOP) for the care of TB patients with diabetes mellitus
  - d. Training requirement for staff on non-communicable diseases
  - e. Essential medicines list
5. Describe the protocol or give a summary of the protocol followed if “Yes” to 4C above.

---

---

6. If a TB patient has DM, is the treatment offered at the same consultation room? Yes/No
  7. Where a TB patient is HIV positive and has diabetes mellitus, is the treatment for the three conditions offered at the same consultation room? Yes/No
  8. Does your facility provide HbA1c? Yes/No
  9. If Yes to 8 above, describe the referral process:
- 

10. Indicate Yes/No if the following services are offered to TB clients at baseline:
  - a. HIV Testing
  - b. Fasting/random blood glucose
  - c. Blood Pressure measurement
11. Indicate Yes/No if the following services are offered to TB clients during follow-up visits:
  - a. HIV Testing
  - b. Fasting/random blood glucose
  - c. Blood Pressure measurement
12. Indicate if the following are available or not available for TB patient screening at your OPD:
  - a. Sphygmomanometer
  - b. Weighing scale
  - c. Glucometer
  - d. Urinalysis test strips
13. Indicate Yes/No if the following medications are available for dispensing at your facility:
  - a. Insulin
  - b. Oral DM drugs
  - c. Antihypertensive medication
14. Indicate Yes/No if there has been a stock-out of the following medications at your hospital in the last six months:
  - a. Glucometer test strips
  - b. Urinalysis test strips
  - c. Insulin
  - d. Oral DM medication
  - e. Antihypertensive medication
  - f. At least one 1<sup>st</sup> line TB medication
15. How many clinical staff (doctors and nurses) provide care for TB patients in your hospital?  
\_\_\_\_\_

### ***Section C: Qualitative Interview***

#### ***Healthcare Providers Perspective***

1. Considering the number of TB Patients seen daily at your TB department, do you think your department has enough clinical staff? \_\_\_\_\_
  2. What best practices have your unit adopted that has improved the care of TB clients receiving treatment for Diabetes Mellitus?
- 
-

3. What is your view of the current standard of care for TB patients? \_\_\_\_\_  
\_\_\_\_\_
4. Do you feel you are well trained and prepared to provide the required care for TB clients with DM?  
\_\_\_\_\_  
\_\_\_\_\_
5. Are there any challenges that hinder you from providing effective care to TB Patients in your hospital?  
\_\_\_\_\_  
\_\_\_\_\_
6. Are there any challenges that limit the provision of diabetes mellitus care to TB patients in your hospital?  
\_\_\_\_\_  
\_\_\_\_\_
7. What would you suggest that can improve services delivery for TB patients with diabetes mellitus?  
\_\_\_\_\_  
\_\_\_\_\_
8. In the last 18 months, how has the COVID-19 Pandemic affected your ability to provide care to TB patients with diabetes mellitus?  
\_\_\_\_\_  
\_\_\_\_\_
9. Other comments \_\_\_\_\_
