# Supplementary material
Source: HighWire-hosted journal article supplement (https://bmjopen.bmj.com/content/12/6/e059254)
Supplement: inline-supplementary-material-4 [file inline-supplementary-material-4.pdf]

Supplementary File 4: TB Treatment Card

### TB 01: Tuberculosis Treatment Card

Name: \_\_\_\_\_ Registration TB No.: \_\_\_\_\_  
 Physical Address: \_\_\_\_\_ Date of Registration: \_\_\_\_\_  
 \_\_\_\_\_ Health Facility: \_\_\_\_\_  
 Sex: (M / F) \_\_\_\_\_ Age: \_\_\_\_\_ Contact Number: \_\_\_\_\_ Pregnant / Non Pregnant: \_\_\_\_\_  
 Name of Treatment Supporter: \_\_\_\_\_ FP Method: \_\_\_\_\_  
 Contact No.: \_\_\_\_\_ Height: \_\_\_\_\_

| Anthropometrics (Monthly) |          |         |         |                  | Baseline Xpert Ultra |              | Sputum Smear Microscopy |      |        |         | Culture |        |         |
|---------------------------|----------|---------|---------|------------------|----------------------|--------------|-------------------------|------|--------|---------|---------|--------|---------|
|                           | Baseline | Month 2 | Month 5 | End of Treatment | Result               | Date/Lab No. | Month                   | Date | Result | Lab No. | Date    | Result | Lab No. |
| Weight                    |          |         |         |                  |                      |              | 0                       |      |        |         |         |        |         |
| BMI                       |          |         |         |                  |                      |              | 2                       |      |        |         |         |        |         |
| MUAC                      |          |         |         |                  |                      |              | 5                       |      |        |         |         |        |         |
| BP                        | / /      | / /     | / /     | / /              |                      |              | End                     |      |        |         |         |        |         |
| RBS                       |          |         |         |                  |                      |              |                         |      |        |         |         |        |         |
| Alt                       |          |         |         |                  |                      |              |                         |      |        |         |         |        |         |
| HB                        |          |         |         |                  |                      |              |                         |      |        |         |         |        |         |
| Creatinine                |          |         |         |                  |                      |              |                         |      |        |         |         |        |         |

| DST   |  | X-RAY   |  |
|-------|--|---------|--|
| Date: |  | Date:   |  |
| R     |  | Results |  |
| H     |  |         |  |
| E     |  |         |  |
| S     |  |         |  |

| Disease Classification             |                                         |
|------------------------------------|-----------------------------------------|
| Pulmonary <input type="checkbox"/> | Extrapulmonary <input type="checkbox"/> |
| Specify:                           |                                         |
| Patient Registration Group         |                                         |
| New                                | <input type="checkbox"/>                |
| Relapse                            | <input type="checkbox"/>                |
| Previously Treated                 | <input type="checkbox"/>                |
| Previously Treated History unknown | <input type="checkbox"/>                |
| Other (Specify)                    | <input type="checkbox"/>                |

|                                                      |  |
|------------------------------------------------------|--|
| Nutritional Support/Food by Prescription Start Date: |  |
| Nutritional Support/Food by Prescription End Date:   |  |

| HIV Testing and Counselling |        |                            |              | HIV Care           |  |
|-----------------------------|--------|----------------------------|--------------|--------------------|--|
| Date of Test                | Result | Post-Test Counselling Date | CPT/Daps one | Date Started       |  |
|                             |        |                            | CD4          | Date/at initiation |  |
|                             |        |                            | VL           | Date/Most Recent   |  |
|                             |        |                            | ART          | Y/N/Unk            |  |
|                             |        |                            |              | Date Started ART   |  |
|                             |        |                            |              | ART Number         |  |
|                             |        |                            |              | ART Regimen/Doses  |  |

|                                                                                                                                            |                                                                                                            |
|--------------------------------------------------------------------------------------------------------------------------------------------|------------------------------------------------------------------------------------------------------------|
| <b>Initial Phase:</b><br>1. Fill in prescribed regimen and dosage<br>2. Indicate number of tablets per dose and dosages in milligrams (mg) | <b>Description of Drugs:</b><br>R: Rifampicin<br>H: Isoniazid<br>Z: Pyrazinamide<br>E: Ethambutol<br>Other |
|--------------------------------------------------------------------------------------------------------------------------------------------|------------------------------------------------------------------------------------------------------------|

|                                      |                                                         |                             |
|--------------------------------------|---------------------------------------------------------|-----------------------------|
| ADULT <input type="checkbox"/>       | CHILD <input type="checkbox"/>                          | OTHER: <input type="text"/> |
| 4FDC (HRZE) <input type="checkbox"/> | HRZ <input type="checkbox"/> E <input type="checkbox"/> |                             |

ADMINISTRATION OF DRUGS: Use one row per month. Mark in the boxes copying from the treatment supporter card: √ = directly observed card; - = Not supervised; 0 = Not taken

| Day | 1 | 2 | 3 | 4 | 5 | 6 | 7 | 8 | 9 | 10 | 11 | 12 | 13 | 14 | 15 | 16 | 17 | 18 | 19 | 20 | 21 | 22 | 23 | 24 | 25 | 26 | 27 | 28 | 29 | 30 | 31 | Drugs given to supporter, date |
|-----|---|---|---|---|---|---|---|---|---|----|----|----|----|----|----|----|----|----|----|----|----|----|----|----|----|----|----|----|----|----|----|--------------------------------|
| M   |   |   |   |   |   |   |   |   |   |    |    |    |    |    |    |    |    |    |    |    |    |    |    |    |    |    |    |    |    |    |    |                                |
|     |   |   |   |   |   |   |   |   |   |    |    |    |    |    |    |    |    |    |    |    |    |    |    |    |    |    |    |    |    |    |    |                                |
